# Supplementary material for: Diversity in geoscience: Participation, behaviour, and the division of scientific labour at a Canadian geoscience conference
Source: Atypon-hosted journal article supplement (doi:10.1139/facets-2017-0111), 2018-04-19

Figure S1: In-session observation templates. One ‘Session Overview’ template was used per session. During sessions, one observer would complete a structural observation template for each presentation, and another observer would complete the substance observation template for each presentation.

### **SESSION OVERVIEW**

**Session Name:**

*Date:*

*Time:*

*Convener(s):*

*Co-Chairs:*

---

#### **Material setup:**

Room number # \_\_\_\_\_

Any comments on seating? (*e.g. back seats blocked off*)

Other comments? (*e.g. sound or lighting*)

#### **End of session overview comments:**

Which presentations were most popular?

Other observations?

## #1: Substance

1. Presentation title: \_\_\_\_\_

## 2. Form of storytelling

2a. Story arc: (name main sections of presentation)

---

2b. Visual content emphasis (e.g. tick and circle one)

- |                                 |                    |                                   |                    |
|---------------------------------|--------------------|-----------------------------------|--------------------|
| <input type="checkbox"/> Table  | None / Few / A lot | <input type="checkbox"/> Video    | None / Few / A lot |
| <input type="checkbox"/> Graphs | None / Few / A lot | <input type="checkbox"/> Equation | None / Few / A lot |
| <input type="checkbox"/> Photos | None / Few / A lot | <input type="checkbox"/> Text     | None / Few / A lot |

2c. Other comments on story-telling (linear, metaphor, narrative devices, clarity of structure):

---

2d. Slide information density: (circle one) Low / Moderate / Busy

## 3. Real world justification

3a. Connection to real world problems: (circle one) None / Vague / Clear

3b. Notes on real-world justification: \_\_\_\_\_

## 4. Primary method

What types of method(s) were used in the research? (select as many as necessary)

- |                                        |                                                    |                                         |
|----------------------------------------|----------------------------------------------------|-----------------------------------------|
| <input type="checkbox"/> Field methods | <input type="checkbox"/> Remote data collection    | <input type="checkbox"/> Social methods |
| <input type="checkbox"/> Lab           | <input type="checkbox"/> Modelling (on a computer) | <input type="checkbox"/> Other: _____   |

## 5a. What is the intellectual 'contribution' of the presentation? (How is their work received?)

- |                                                                                               |                                                           |
|-----------------------------------------------------------------------------------------------|-----------------------------------------------------------|
| <input type="checkbox"/> New data from an observational OR experimental (circle one) campaign | <input type="checkbox"/> Developing a method or technique |
| <input type="checkbox"/> Reanalysis of existing data                                          | <input type="checkbox"/> Literature review                |
| <input type="checkbox"/> Combining data sets                                                  | <input type="checkbox"/> Solution to an applied problem   |
| <input type="checkbox"/> Theoretical contribution                                             | <input type="checkbox"/> Other: _____                     |

5b. How does the presenter specify the contribution value-added: (e.g. falsify theory, novel dataset, generalization)

---

## 6. Acknowledgements

6a. Who is acknowledged? (e.g. supervisor, lab group, colleagues, student, funders)

- |                                     |                                      |
|-------------------------------------|--------------------------------------|
| <input type="checkbox"/> Supervisor | <input type="checkbox"/> Student     |
| <input type="checkbox"/> Lab group  | <input type="checkbox"/> Funders     |
| <input type="checkbox"/> Co-authors | <input type="checkbox"/> Institution |

6b. How are others acknowledged? (e.g. verbally, by name, citation, acknowledgements slide, use of "we", on title slide)

---

6c. How frequent are acknowledgements? (circle one) at beginning / throughout / at end

6d. How does the presenter represent themselves? (e.g. cites own papers, "my work", trademarks)

---

6e. Recognition of funding/supporting organisations: (circle one) None / Brief / Prominent

## 7. Presentation Style:

7a. Language: (Disciplinary specialist) 1 -- 2 -- 3 -- 4 -- 5 (Educated non-specialist)

7b. Comments on language (e.g. use of technical terms, self-deprecating remarks, gendered language, jokes)

---

7c. Body language (e.g. confident gestures, fidgeting, movement, laughter): \_\_\_\_\_

7d. Use of notes/slides:

- |                                            |                                               |                                             |
|--------------------------------------------|-----------------------------------------------|---------------------------------------------|
| <input type="checkbox"/> Reading off notes | <input type="checkbox"/> Responding to slides | <input type="checkbox"/> Reading off slides |
|--------------------------------------------|-----------------------------------------------|---------------------------------------------|

7e. Confidence presenting: (Uncertain, stumbles) 1 -- 2 -- 3 -- 4 -- 5 (Confident, at ease)

## #2: Structural

1. Presentation title: \_\_\_\_\_

### 2. Speaker

2a. Sex: F / M  
2b. Stage: (Student) (Early) (Mid) (Late) (Retired)  
2c. Sector: (Academia) (Industry) (Public)  
2d. Visible minority? Yes / No  
2e. Fluent in English? Yes / No  
2f. Accent: Canadian English / French / Other

### 3. Chair

3a. Introduction given? Yes / No  
3b. Timekeeping signalled Yes / No  
3c. Timekeeping enforced? Yes / No

4. Time length of presentation: \_\_\_\_\_ mins (if needed: beginning: \_\_\_\_\_ end: \_\_\_\_\_)

5. Technology issues? \_\_\_\_\_

6. Audience (i.e. anyone sitting in an audience seat, not including the session observers)

6a. No. people in audience \_\_\_\_\_

6b. No. females in audience \_\_\_\_\_

### 7. Audience behavior

|                                                 |      |   |      |   |       |
|-------------------------------------------------|------|---|------|---|-------|
| 7a. People shuffling in/out during presentation | None | / | Some | / | A lot |
| 7b. People talking to each other                | None | / | Some | / | A lot |
| 7c. Using technology during presentation        | None | / | Some | / | A lot |

7d. Notes on audience behaviour: \_\_\_\_\_

### 8. Presentation style

8a. Language: (Disciplinary specialist) 1 -- 2 -- 3 -- 4 -- 5 (Educated non-specialist)

8b. Comments on language (e.g. use of technical terms, self-deprecating remarks, gendered language, jokes)

8c. Body language (e.g. confident gestures, fidgeting, movement, laughter): \_\_\_\_\_

8d. Use of notes/slides:

- |                                             |                                               |
|---------------------------------------------|-----------------------------------------------|
| <input type="checkbox"/> Reading off slides | <input type="checkbox"/> Memorised            |
| <input type="checkbox"/> Reading off notes  | <input type="checkbox"/> Responding to slides |

8e. Confidence presenting: (Uncertain, stumbles) 1 -- 2 -- 3 -- 4 -- 5 (Confident, at ease)

**Question 1**

Asked by: F / M  
(Student) (Early) (Mid) (Late) (Unknown)

Type of question(s): *(select as many as necessary)*

- |                                                                                    |                                                             |
|------------------------------------------------------------------------------------|-------------------------------------------------------------|
| <input type="checkbox"/> Clarification                                             | <input type="checkbox"/> Multi-part question                |
| <input type="checkbox"/> Requesting further information                            | <input type="checkbox"/> Follow-up question                 |
| <input type="checkbox"/> Repudiation of presenter's statement/findings/conclusions | <input type="checkbox"/> Interrupts presenter during answer |
| <input type="checkbox"/> Statement of questioner's knowledge/thoughts              | <input type="checkbox"/> Other: _____                       |

Length of question: <30 sec / 30-60 sec / 60-90 sec / >90 sec

Tone of question: *(e.g. supportive, inviting, condescending, polite, inquisitive, argumentative)* \_\_\_\_\_

Notes on response: *(e.g. tone, length of response)* \_\_\_\_\_

Other notes/details: \_\_\_\_\_

**Question 2**

Asked by: F / M  
(Student) (Early) (Mid) (Late) (Unknown)

Type of question(s): *(select as many as necessary)*

- |                                                                                    |                                                             |
|------------------------------------------------------------------------------------|-------------------------------------------------------------|
| <input type="checkbox"/> Clarification                                             | <input type="checkbox"/> Multi-part question                |
| <input type="checkbox"/> Requesting further information                            | <input type="checkbox"/> Follow-up question                 |
| <input type="checkbox"/> Repudiation of presenter's statement/findings/conclusions | <input type="checkbox"/> Interrupts presenter during answer |
| <input type="checkbox"/> Statement of questioner's knowledge/thoughts              | <input type="checkbox"/> Other: _____                       |

Length of question: <30 sec / 30-60 sec / 60-90 sec / >90 sec

Tone of question: *(e.g. supportive, inviting, condescending, polite, inquisitive, argumentative)* \_\_\_\_\_

Notes on response: *(e.g. tone, length of response)* \_\_\_\_\_

Other notes/details: \_\_\_\_\_

**Question 3**

Asked by: F / M  
(Student) (Early) (Mid) (Late) (Unknown)

Type of question(s): *(select as many as necessary)*

- |                                                                                    |                                                             |
|------------------------------------------------------------------------------------|-------------------------------------------------------------|
| <input type="checkbox"/> Clarification                                             | <input type="checkbox"/> Multi-part question                |
| <input type="checkbox"/> Requesting further information                            | <input type="checkbox"/> Follow-up question                 |
| <input type="checkbox"/> Repudiation of presenter's statement/findings/conclusions | <input type="checkbox"/> Interrupts presenter during answer |
| <input type="checkbox"/> Statement of questioner's knowledge/thoughts              | <input type="checkbox"/> Other: _____                       |

Length of question: <30 sec / 30-60 sec / 60-90 sec / >90 sec

Tone of question: *(e.g. supportive, inviting, condescending, polite, inquisitive, argumentative)* \_\_\_\_\_

Notes on response: *(e.g. tone, length of response)* \_\_\_\_\_

Other notes/details: \_\_\_\_\_

**Response**

What were the effects of questions on presenter?

\_\_\_\_\_

Figure S2: The percentage of presenters in observed sessions within each career stage category, broken down by gender.

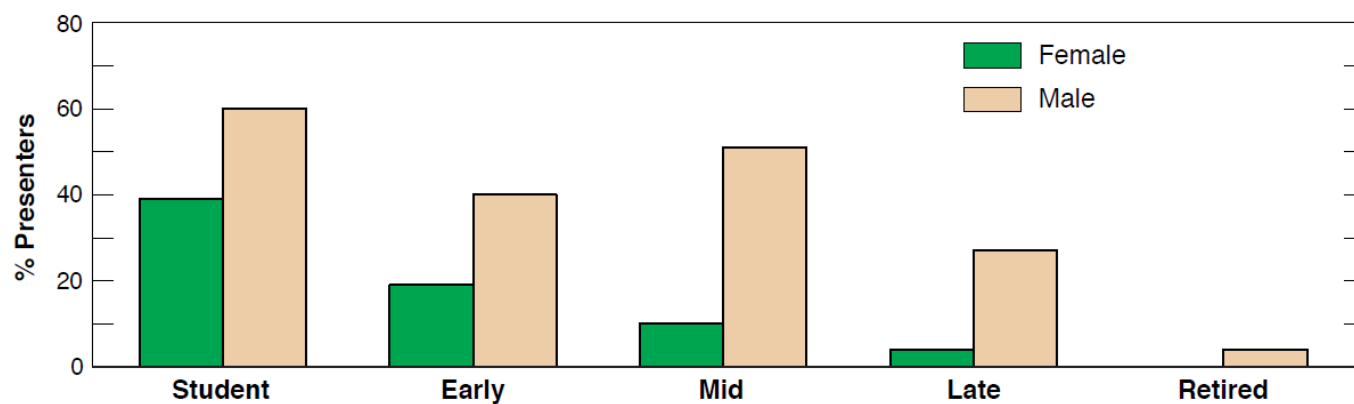

Figure S3: The average audience size (count) by geoscience section.

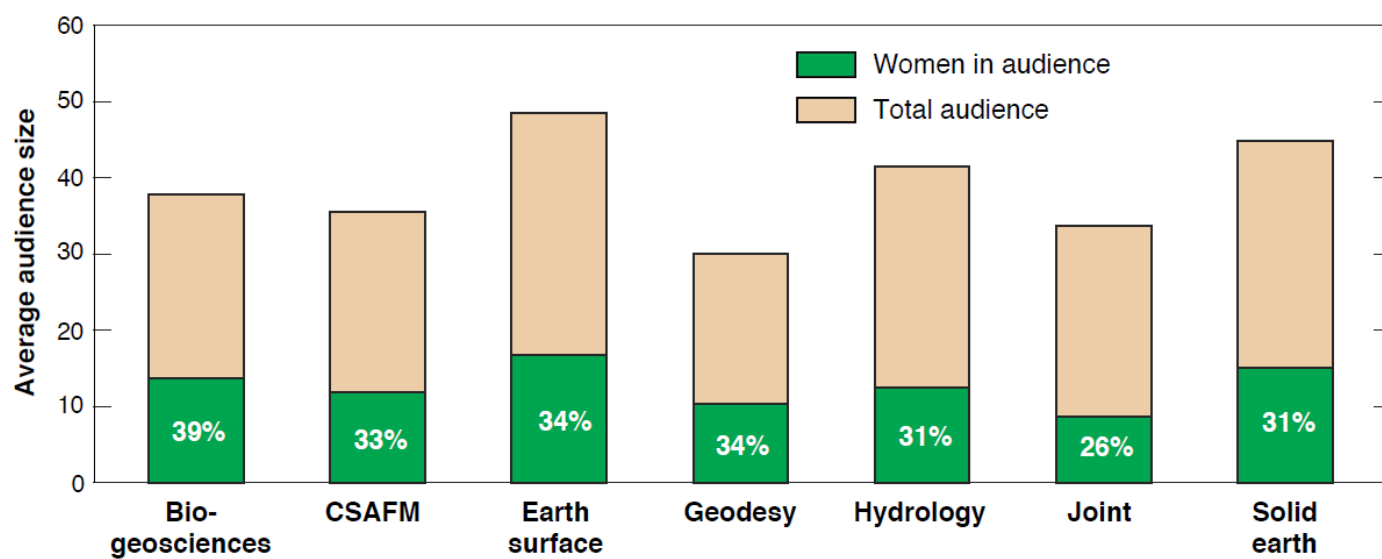

Figure S4: Percentage of presenters who provided a real-world justification for their research, by gender, ethnic affiliation, and career stage.\*

| Presenter category                  | % no justification | % vague justification | % clear justification |
|-------------------------------------|--------------------|-----------------------|-----------------------|
| <b>Presenter gender</b>             |                    |                       |                       |
| Female (n = 72)                     | 20                 | 27                    | 54                    |
| Male (n = 180)                      | 28                 | 33                    | 39                    |
| <b>Presenter ethnic affiliation</b> |                    |                       |                       |
| People of colour (n = 52)           | 40                 | 35                    | 25                    |
| White (n = 200)                     | 22                 | 30                    | 48                    |
| <b>Presenter career stage</b>       |                    |                       |                       |
| Student (n = 98)                    | 22                 | 36                    | 42                    |
| Early (n = 59)                      | 27                 | 36                    | 37                    |
| Mid (n = 59)                        | 27                 | 25                    | 47                    |
| Late (n = 31)                       | 35                 | 23                    | 42                    |
| Retired (n = 3)                     | 33                 | 0                     | 67                    |

\*n = total number of presentations per gender, ethnicity, or career stage. Total n = 252 (data on intellectual contribution was not collected for 4 presentations)

Figure S5: Breakdown of types of questions asked in sessions with no female presenters, fewer than 50% female presenters, and 50% or more female presenters.

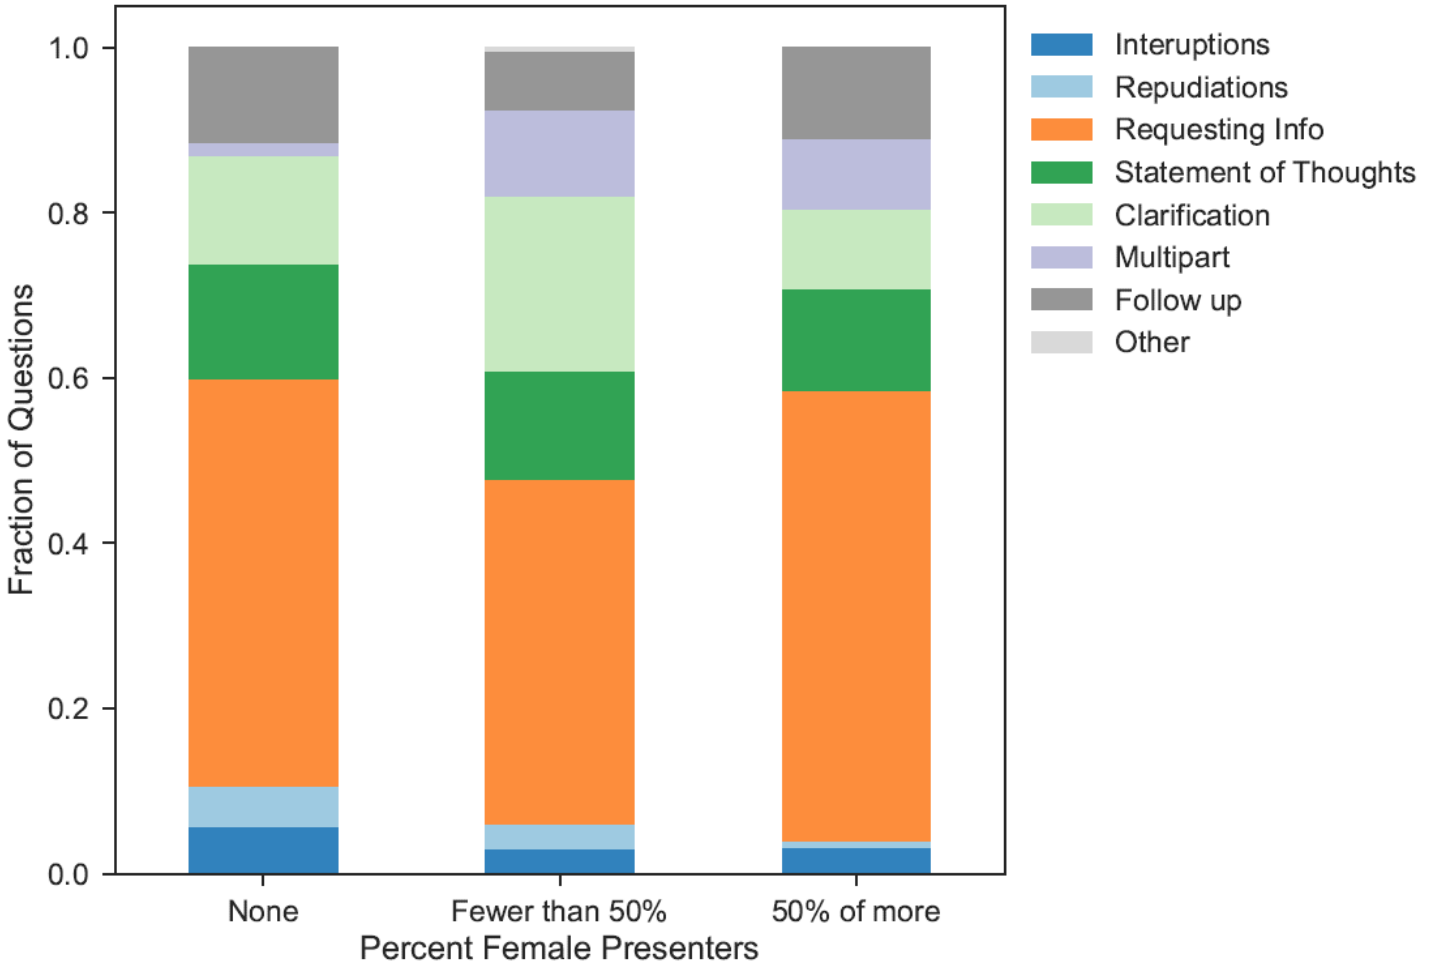

Supplement: facets-2017-0111_supplement1.pdf [file facets-2017-0111_supplement1.pdf]
